CORRECTION

## Correction: Renal cancer survival in clear cell renal cancer compared to other types of tumor histology: A population-based cohort study

**Teesi Sepp, Antti Poyhonen, Anneli Uusküla, Andres Kotsar, Thea Veitonmäki, Teuvo L. J. Tammela, Aleksei Baburin, Teemu J. Murtola**

The Funding statement for this article is incorrect. The correct Funding statement is as follows: This work was supported by the Estonian Research Council grant number PRG2218. The funders had no role in study design, data collection and analysis, decision to publish, or preparation of the manuscript.

### Reference

1. Sepp T, Poyhonen A, Uusküla A, Kotsar A, Veitonmäki T, Tammela TLJ, et al. Renal cancer survival in clear cell renal cancer compared to other types of tumor histology: A population-based cohort study. PLoS One. 2025;20(7):e0329000. <https://doi.org/10.1371/journal.pone.0329000> PMID: [40743229](https://pubmed.ncbi.nlm.nih.gov/40743229/)

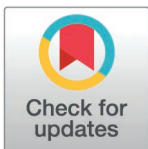

### OPEN ACCESS

**Citation:** Sepp T, Poyhonen A, Uusküla A, Kotsar A, Veitonmäki T, Tammela TLJ, et al. (2026) Correction: Renal cancer survival in clear cell renal cancer compared to other types of tumor histology: A population-based cohort study. PLoS One 21(1): e0342010. <https://doi.org/10.1371/journal.pone.0342010>

**Published:** January 29, 2026

**Copyright:** © 2026 Sepp et al. This is an open access article distributed under the terms of the [Creative Commons Attribution License](https://creativecommons.org/licenses/by/4.0/), which permits unrestricted use, distribution, and reproduction in any medium, provided the original author and source are credited.
